# Supplementary material
Source: publisher figshare collection journal article supplement (https://acs.figshare.com/ndownloader/files/4256287)
Supplement: Supplementary file 1 [file 4256287]

Table S1. Calculated adsorption energies of the reactants ( $\text{CH}_3\text{CO}$ ,  $\text{CH}_3\text{CN}$ , and  $\text{CH}_3\text{CH}_2$ ) and the products ( $\text{CH}_3$ ,  $\text{CO}$ ,  $\text{CN}$ , and  $\text{CH}_2$ ) on Ni, Cu/Ni and Pt/Ni surfaces respectively.

|                          |                                   | Ni                    | Cu/Ni | Pt/Ni |
|--------------------------|-----------------------------------|-----------------------|-------|-------|
|                          | site                              | adsorption energy /eV |       |       |
| Reactant                 |                                   |                       |       |       |
| $\text{CH}_3\text{CO}$   | $\eta^2\eta^1(\text{C},\text{O})$ | -3.29                 | -3.52 | -4.27 |
| $\text{CH}_3\text{CN}$   | $\eta^1\eta^3(\text{C},\text{N})$ | -1.15                 | -1.57 | -2.33 |
| $\text{CH}_3\text{CH}_2$ | Top- $\eta^1(\text{C})$           | -1.82                 | -1.92 | -2.18 |
| Products                 |                                   |                       |       |       |
| $\text{CH}_3$            | top                               | -2.17                 | -2.24 | -2.49 |
| $\text{CO}$              | fcc                               | -1.91                 | -2.23 | -2.45 |
| $\text{CN}$              | fcc                               | -4.46                 | -4.70 | -5.21 |
| $\text{CH}_2$            | bridge                            | -5.34                 | -5.45 | -5.90 |
